# Supplementary material for: Less than full-time training (LTFT), is this the new norm? A cross-sectional study using a UK-wide online survey to evaluate trainees’ views and intentions for LTFT
Source: HighWire-hosted journal article supplement (doi:10.1136/bmjopen-2022-064518), 2022-11-01
Supplement: bmjopen-2022-064518supp001_data_supplement.pdf [file bmjopen-2022-064518supp001_data_supplement.pdf]

### Survey Questions

- 1) **What speciality do you do?**
- 2) **If you are yet to subspecialise, what speciality to you intend to do?**
- 3) **What Training Grade are you?**
- 4) **Where do you currently work?**

Answer Choices

Scotland - West  
Scotland - North  
Scotland - East  
Scotland - South East  
Northern Ireland  
Wales  
England - East Anglia  
England - Essex, Bedfordshire and Hertfordshire  
England -Leicestershire, Northamptonshire and Rutland  
England - North London  
England - North West of England  
England - North East  
England - Oxford  
England - Peninsula  
England - Severn  
England - South Thames South London East  
England - South Thames South London West  
England - South Thames KSS Central  
England - South Thames KSS East  
England - South Thames KSS West  
England - Trent  
England - Wessex  
England - West Midlands Central  
England - West Midlands North  
England - West Midlands South  
England - Yorkshire and Humber North Yorkshire and East Coast  
England - Yorkshire and Humber South Yorkshire  
England - Yorkshire and Humber West Yorkshire

- 5) **Are you currently undertaking your training via a Less Than Full Time working pattern?**

Answer Choices

Yes  
No

**6) What is your working pattern?**

Answer Choices

50%

60%

80%

Other (please specify)

**7) Did you find the process of becoming Less Than Full Time straight forward?**

Answer Choices

None of the above

Yes

No

If no, why did you not find this process straight forward?

**8) Has Less Than Full Time Training had any negative impact on your training?**

Answer Choices

Yes

No

If yes, please expand on this if you would like to.

**9) Have you encountered any other difficulties going Less Than Full Time?**

Answer Choices

Yes

No

If yes, please expand on this if you would like to.

**10) If you would like to, please let us know the primary reason why you work Less Than Full Time.**

Answer Choices

Childcare

Health Reasons

Lifestyle

Prefer not to say

Other (please specify)

**11) Did the COVID-19 Pandemic impact on your decision to go Less Than Full Time?**

Answer Choices

Yes

No

**12) In some specialties working Less Than Full Time for lifestyle reasons alone is not currently available. If this were to become available, would you be applying for Less Than Full Time?**

Answer Choices

Yes

No

Unsure

**13) Do you intend to work Less Than Full Time In the Future?**

Answer Choices

Yes

No

Undecided

**14) When do you intend to go Less Than Full Time?**

Answer Choices

2022

2023

2024

2025

2026

2027 or later

Undecided

**15) How much do you intend to work as a percentage?**

Answer Choices

50%

60%

80%

Undecided

Other (please specify)

**16) Why do you want to work Less Than Full Time?**

Answer Choices

Child Care

Health Reasons

Lifestyle

Other (please specify)

**17) Did the COVID-19 pandemic have any impact on your decision to go Less Than Full Time?**

Answer Choices

- Yes
- No

**18) Do you have worries about the impact of going Less Than Full Time on your training?**

Answer Choices

- Yes
- No

If yes, please let us know why if you wish to share this information.

**19) Do you work with other Less Than Full Time Trainees?**

Answer Choices

- Yes
- No

**20) How many colleagues have you worked with who are Less Than Full Time Training currently?**

Answer Choices

- 1
- 2
- 3 or more

**21) Do you feel, working with someone who is Less Than Full Time, that there is a resulting impact on the rota and the workload?**

Answer Choices

- Yes
- No

If yes, how has there been an impact?

**22) Have you encountered any problems with colleagues going Less Than Full Time?**

Answer Choices

- Yes
- No

Please let us know which problems you have encountered if you so wish.

**23) If you wish to go Less Than Full Time do you know who to speak to or how to access further relevant information?**

Answer Choices

- Yes
- No

**24) Do you intend to work Full-Time or Less Than Full Time in a future Consultant position?**

Answer Choices

Full-Time

Less Than Full Time

Unsure

**25) Do you think that training in a Less Than Full Time format would put you at a disadvantage when applying for a consultant post?**

Answer Choices

Yes

No

Unsure

If yes, in what way do you think you at a disadvantage?
